# Supplementary material
Source: publisher site journal article supplement (https://www.spandidos-publications.com/2536/downloadSupplementary)

Figure S1. Receiver operating characteristic curve for predicting recurrence after Hx of (A) PNI, (B) NLR and (C) ALRI. Cut-off values of PNI, NLR and ALRI were 45.0, 2.3 and 30.8, respectively. PNI, prognostic nutritional index; NLR, neutrophil-to-lymphocyte ratio; ALRI, aspartate aminotransferase-to-lymphocyte ratio; AUC, area under the curve.

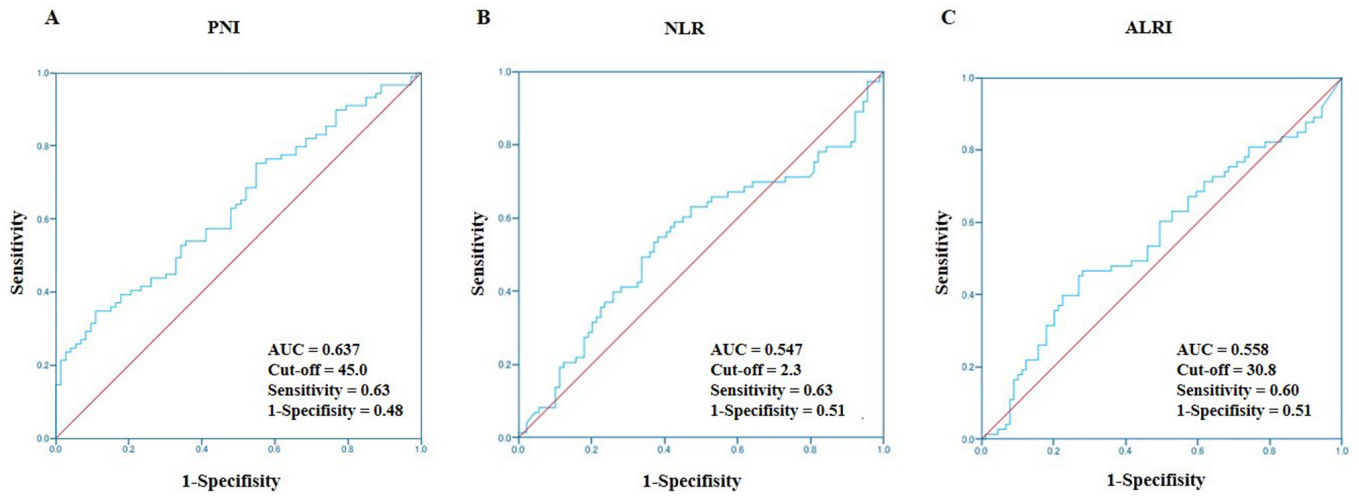

Supplement: Supplementary file 1 [file downloadSupplementary]
